# Supplementary material
Source: publisher figshare collection journal article supplement (https://frontiersin.figshare.com/ndownloader/files/12864647)

Fig. S1: Linear regression relationships between TP/NH<sub>4</sub><sup>+</sup> and Alpha-diversity indices of CHAO, Simpson and Evenness.

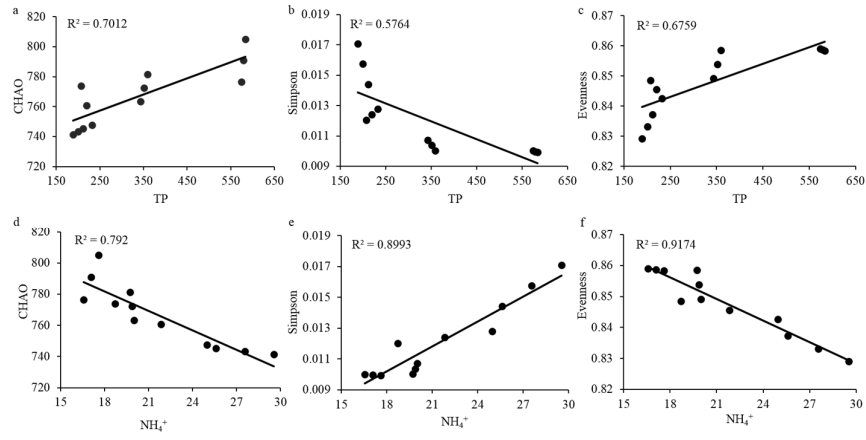

Supplement: Supplementary file [file 12864647]
